# Supplementary material for: Analysis of the Interaction Mechanism of the Risk Factors of Gas Explosions in Chinese Underground Coal Mines
Source: MDPI journal article supplement (doi:10.3390/ijerph19021002), 2022-01-17
Supplement: s1 [file s1]

**Table S1.** The profiles of interviewees.

| Experts  | Work organization                                 | Role            | Experience | Interview method |
|----------|---------------------------------------------------|-----------------|------------|------------------|
| Expert A | China University of Mining & Technology (Beijing) | Professor       | 21 years   | Face-to-face     |
| Expert B | China University of Geosciences (Beijing)         | Professor       | 18 years   | Face-to-face     |
| Expert C | Liaoning Technical University                     | Professor       | 24 years   | Email            |
| Expert D | Zhengzhou Coal Industry (Group) Co., Ltd.         | Senior Engineer | 14 years   | Face-to-face     |
| Expert E | Jizhong Energy Group Co., Ltd.                    | Senior Engineer | 17 years   | Email            |
| Expert F | Shanxi Coking Coal Group Co., Ltd.                | Senior Engineer | 11 years   | Face-to-face     |
| Expert G | Huayang New Material Technology Group Co., Ltd    | Senior Engineer | 13 years   | Email            |

**Table S2.** The direct-relation matrix of the representative risk factors of gas explosions.

[illegible]

|          |   |   |   |   |   |   |   |   |   |   |   |   |   |   |   |   |   |   |   |   |   |
|----------|---|---|---|---|---|---|---|---|---|---|---|---|---|---|---|---|---|---|---|---|---|
| $F_{14}$ | 0 | 0 | 0 | 0 | 0 | 0 | 0 | 0 | 0 | 0 | 0 | 0 | 0 | 0 | 0 | 0 | 0 | 0 | 0 | 0 | 0 |
| $F_{15}$ | 0 | 0 | 0 | 0 | 0 | 0 | 0 | 0 | 0 | 0 | 0 | 0 | 0 | 0 | 0 | 0 | 0 | 0 | 0 | 0 | 0 |
| $F_{16}$ | 0 | 4 | 0 | 4 | 4 | 3 | 0 | 0 | 0 | 0 | 0 | 0 | 0 | 0 | 0 | 0 | 0 | 2 | 0 | 3 | 0 |
| $F_{17}$ | 2 | 4 | 0 | 3 | 3 | 0 | 0 | 0 | 0 | 0 | 0 | 0 | 0 | 0 | 0 | 0 | 0 | 0 | 0 | 0 | 0 |
| $F_{18}$ | 0 | 0 | 0 | 4 | 3 | 0 | 3 | 2 | 0 | 0 | 0 | 0 | 0 | 0 | 0 | 0 | 0 | 0 | 0 | 2 | 2 |
| $F_{19}$ | 2 | 0 | 0 | 0 | 0 | 0 | 0 | 2 | 2 | 0 | 0 | 0 | 0 | 0 | 2 | 0 | 2 | 0 | 0 | 2 | 0 |
| $F_{20}$ | 0 | 0 | 0 | 0 | 0 | 4 | 4 | 3 | 2 | 2 | 0 | 0 | 0 | 0 | 0 | 0 | 0 | 0 | 0 | 0 | 0 |
| $F_{21}$ | 0 | 0 | 0 | 0 | 0 | 0 | 0 | 0 | 0 | 0 | 0 | 2 | 2 | 2 | 0 | 0 | 0 | 0 | 0 | 0 | 0 |

**Table S3.** The total-relation matrix of the representative risk factors of gas explosions.

|          | $F_1$ | $F_2$ | $F_3$ | $F_4$  | $F_5$  | $F_6$  | $F_7$  | $F_8$  | $F_9$  | $F_{10}$ | $F_{11}$ | $F_{12}$ | $F_{13}$ | $F_{14}$ | $F_{15}$ | $F_{16}$ | $F_{17}$ | $F_{18}$ | $F_{19}$ | $F_{20}$ | $F_{21}$ |
|----------|-------|-------|-------|--------|--------|--------|--------|--------|--------|----------|----------|----------|----------|----------|----------|----------|----------|----------|----------|----------|----------|
| $F_1$    | 0     | 0     | 0     | 0.01   | 0.01   | 0      | 0.01   | 0      | 0.01   | 0.01     | 0        | 0        | 0        | 0        | 0        | 0        | 0        | 0        | 0        | 0        | 0.01     |
| $F_2$    | 0     | 0     | 0     | 0.0225 | 0.0225 | 0.01   | 0      | 0      | 0      | 0        | 0        | 0        | 0        | 0        | 0        | 0        | 0        | 0        | 0        | 0        | 0.01     |
| $F_3$    | 0.01  | 0.01  | 0     | 0      | 0      | 0      | 0      | 0      | 0      | 0        | 0        | 0        | 0        | 0        | 0        | 0        | 0        | 0        | 0        | 0        | 0        |
| $F_4$    | 0     | 0     | 0     | 0      | 0      | 0      | 0      | 0      | 0      | 0        | 0        | 0        | 0        | 0        | 0        | 0        | 0        | 0        | 0        | 0        | 0        |
| $F_5$    | 0     | 0     | 0     | 0      | 0      | 0      | 0      | 0      | 0      | 0        | 0        | 0        | 0        | 0        | 0        | 0        | 0        | 0        | 0        | 0        | 0        |
| $F_6$    | 0     | 0     | 0     | 0      | 0      | 0      | 0      | 0      | 0      | 0        | 0        | 0.0225   | 0        | 0.01     | 0.01     | 0        | 0        | 0        | 0        | 0        | 0        |
| $F_7$    | 0     | 0     | 0     | 0      | 0      | 0      | 0      | 0      | 0      | 0        | 0        | 0        | 0        | 0        | 0        | 0        | 0        | 0        | 0        | 0        | 0        |
| $F_8$    | 0     | 0     | 0     | 0      | 0      | 0      | 0      | 0      | 0      | 0        | 0        | 0.01     | 0.01     | 0.01     | 0        | 0        | 0        | 0        | 0        | 0        | 0        |
| $F_9$    | 0     | 0     | 0     | 0      | 0      | 0      | 0      | 0      | 0      | 0        | 0        | 0.01     | 0.01     | 0.01     | 0        | 0        | 0        | 0        | 0        | 0        | 0        |
| $F_{10}$ | 0     | 0     | 0     | 0      | 0      | 0      | 0      | 0      | 0      | 0        | 0        | 0        | 0        | 0        | 0        | 0        | 0        | 0        | 0        | 0        | 0        |
| $F_{11}$ | 0     | 0     | 0     | 0      | 0      | 0      | 0      | 0      | 0      | 0.01     | 0        | 0.01     | 0.04     | 0.0225   | 0.01     | 0        | 0        | 0        | 0        | 0        | 0        |
| $F_{12}$ | 0     | 0     | 0     | 0      | 0      | 0      | 0      | 0      | 0      | 0        | 0        | 0        | 0        | 0        | 0        | 0        | 0        | 0        | 0        | 0        | 0        |
| $F_{13}$ | 0     | 0     | 0     | 0      | 0      | 0      | 0      | 0      | 0      | 0        | 0        | 0        | 0        | 0        | 0        | 0        | 0        | 0        | 0        | 0        | 0        |
| $F_{14}$ | 0     | 0     | 0     | 0      | 0      | 0      | 0      | 0      | 0      | 0        | 0        | 0        | 0        | 0        | 0        | 0        | 0        | 0        | 0        | 0        | 0        |
| $F_{15}$ | 0     | 0     | 0     | 0      | 0      | 0      | 0      | 0      | 0      | 0        | 0        | 0        | 0        | 0        | 0        | 0        | 0        | 0        | 0        | 0        | 0        |
| $F_{16}$ | 0     | 0.04  | 0     | 0.05   | 0.049  | 0.0303 | 0      | 0      | 0      | 0        | 0        | 0        | 0        | 0        | 0        | 0        | 0        | 0.01     | 0        | 0.024    | 0        |
| $F_{17}$ | 0.01  | 0.04  | 0     | 0.0285 | 0.0285 | 0      | 0      | 0      | 0      | 0        | 0        | 0        | 0        | 0        | 0        | 0        | 0        | 0        | 0        | 0        | 0        |
| $F_{18}$ | 0     | 0     | 0     | 0.04   | 0.0225 | 0      | 0.0255 | 0.0115 | 0      | 0        | 0        | 0        | 0        | 0        | 0        | 0        | 0        | 0        | 0        | 0.01     | 0.01     |
| $F_{19}$ | 0.01  | 0     | 0     | 0      | 0      | 0      | 0      | 0.0115 | 0.0121 | 0        | 0        | 0        | 0        | 0        | 0.0102   | 0        | 0.01     | 0        | 0        | 0.01     | 0        |

|          |   |   |   |   |   |      |      |        |      |      |   |      |      |      |   |   |   |   |   |   |   |
|----------|---|---|---|---|---|------|------|--------|------|------|---|------|------|------|---|---|---|---|---|---|---|
| $F_{20}$ | 0 | 0 | 0 | 0 | 0 | 0.04 | 0.04 | 0.0225 | 0.01 | 0.01 | 0 | 0    | 0    | 0    | 0 | 0 | 0 | 0 | 0 | 0 | 0 |
| $F_{21}$ | 0 | 0 | 0 | 0 | 0 | 0    | 0    | 0      | 0    | 0    | 0 | 0.01 | 0.01 | 0.01 | 0 | 0 | 0 | 0 | 0 | 0 | 0 |

**Table S4.** The overall effect matrix of the representative risk factors of gas explosions.

|          | $F_1$ | $F_2$ | $F_3$ | $F_4$  | $F_5$  | $F_6$  | $F_7$  | $F_8$  | $F_9$  | $F_{10}$ | $F_{11}$ | $F_{12}$ | $F_{13}$ | $F_{14}$ | $F_{15}$ | $F_{16}$ | $F_{17}$ | $F_{18}$ | $F_{19}$ | $F_{20}$ | $F_{21}$ |
|----------|-------|-------|-------|--------|--------|--------|--------|--------|--------|----------|----------|----------|----------|----------|----------|----------|----------|----------|----------|----------|----------|
| $F_1$    | 1     | 0     | 0     | 0.01   | 0.01   | 0      | 0.01   | 0      | 0.01   | 0.01     | 0        | 0        | 0        | 0        | 0        | 0        | 0        | 0        | 0        | 0        | 0.01     |
| $F_2$    | 0     | 1     | 0     | 0.0225 | 0.0225 | 0.01   | 0      | 0      | 0      | 0        | 0        | 0        | 0        | 0        | 0        | 0        | 0        | 0        | 0        | 0        | 0.01     |
| $F_3$    | 0.01  | 0.01  | 1     | 0      | 0      | 0      | 0      | 0      | 0      | 0        | 0        | 0        | 0        | 0        | 0        | 0        | 0        | 0        | 0        | 0        | 0        |
| $F_4$    | 0     | 0     | 0     | 1      | 0      | 0      | 0      | 0      | 0      | 0        | 0        | 0        | 0        | 0        | 0        | 0        | 0        | 0        | 0        | 0        | 0        |
| $F_5$    | 0     | 0     | 0     | 0      | 1      | 0      | 0      | 0      | 0      | 0        | 0        | 0        | 0        | 0        | 0        | 0        | 0        | 0        | 0        | 0        | 0        |
| $F_6$    | 0     | 0     | 0     | 0      | 0      | 1      | 0      | 0      | 0      | 0        | 0        | 0.0225   | 0        | 0.01     | 0.01     | 0        | 0        | 0        | 0        | 0        | 0        |
| $F_7$    | 0     | 0     | 0     | 0      | 0      | 0      | 1      | 0      | 0      | 0        | 0        | 0        | 0        | 0        | 0        | 0        | 0        | 0        | 0        | 0        | 0        |
| $F_8$    | 0     | 0     | 0     | 0      | 0      | 0      | 0      | 1      | 0      | 0        | 0        | 0.01     | 0.01     | 0.01     | 0        | 0        | 0        | 0        | 0        | 0        | 0        |
| $F_9$    | 0     | 0     | 0     | 0      | 0      | 0      | 0      | 0      | 1      | 0        | 0        | 0.01     | 0.01     | 0.01     | 0        | 0        | 0        | 0        | 0        | 0        | 0        |
| $F_{10}$ | 0     | 0     | 0     | 0      | 0      | 0      | 0      | 0      | 0      | 1        | 0        | 0        | 0        | 0        | 0        | 0        | 0        | 0        | 0        | 0        | 0        |
| $F_{11}$ | 0     | 0     | 0     | 0      | 0      | 0      | 0      | 0      | 0      | 0.01     | 1        | 0.01     | 0.04     | 0.0225   | 0.01     | 0        | 0        | 0        | 0        | 0        | 0        |
| $F_{12}$ | 0     | 0     | 0     | 0      | 0      | 0      | 0      | 0      | 0      | 0        | 0        | 1        | 0        | 0        | 0        | 0        | 0        | 0        | 0        | 0        | 0        |
| $F_{13}$ | 0     | 0     | 0     | 0      | 0      | 0      | 0      | 0      | 0      | 0        | 0        | 0        | 1        | 0        | 0        | 0        | 0        | 0        | 0        | 0        | 0        |
| $F_{14}$ | 0     | 0     | 0     | 0      | 0      | 0      | 0      | 0      | 0      | 0        | 0        | 0        | 0        | 1        | 0        | 0        | 0        | 0        | 0        | 0        | 0        |
| $F_{15}$ | 0     | 0     | 0     | 0      | 0      | 0      | 0      | 0      | 0      | 0        | 0        | 0        | 0        | 0        | 1        | 0        | 0        | 0        | 0        | 0        | 0        |
| $F_{16}$ | 0     | 0.04  | 0     | 0.05   | 0.049  | 0.0303 | 0      | 0      | 0      | 0        | 0        | 0        | 0        | 0        | 0        | 1        | 0        | 0.01     | 0        | 0.024    | 0        |
| $F_{17}$ | 0.01  | 0.04  | 0     | 0.0285 | 0.0285 | 0      | 0      | 0      | 0      | 0        | 0        | 0        | 0        | 0        | 0        | 0        | 1        | 0        | 0        | 0        | 0        |
| $F_{18}$ | 0     | 0     | 0     | 0.04   | 0.0225 | 0      | 0.0255 | 0.0115 | 0      | 0        | 0        | 0        | 0        | 0        | 0        | 0        | 0        | 1        | 0        | 0.01     | 0.01     |
| $F_{19}$ | 0.01  | 0     | 0     | 0      | 0      | 0      | 0      | 0.0115 | 0.0121 | 0        | 0        | 0        | 0        | 0        | 0.0102   | 0        | 0.01     | 0        | 1        | 0.01     | 0        |
| $F_{20}$ | 0     | 0     | 0     | 0      | 0      | 0.04   | 0.04   | 0.0225 | 0.01   | 0.01     | 0        | 0        | 0        | 0        | 0        | 0        | 0        | 0        | 0        | 1        | 0        |
| $F_{21}$ | 0     | 0     | 0     | 0      | 0      | 0      | 0      | 0      | 0      | 0        | 0        | 0.01     | 0.01     | 0.01     | 0        | 0        | 0        | 0        | 0        | 0        | 1        |

**Table S5.** The reachability matrix of the representative risk factors of gas explosions.

|  | $F_1$ | $F_2$ | $F_3$ | $F_4$ | $F_5$ | $F_6$ | $F_7$ | $F_8$ | $F_9$ | $F_{10}$ | $F_{11}$ | $F_{12}$ | $F_{13}$ | $F_{14}$ | $F_{15}$ | $F_{16}$ | $F_{17}$ | $F_{18}$ | $F_{19}$ | $F_{20}$ | $F_{21}$ | Driving Power |
|--|-------|-------|-------|-------|-------|-------|-------|-------|-------|----------|----------|----------|----------|----------|----------|----------|----------|----------|----------|----------|----------|---------------|
|--|-------|-------|-------|-------|-------|-------|-------|-------|-------|----------|----------|----------|----------|----------|----------|----------|----------|----------|----------|----------|----------|---------------|

|                  |   |   |   |   |   |   |   |   |   |   |   |   |   |   |   |   |   |   |   |   |   |   |
|------------------|---|---|---|---|---|---|---|---|---|---|---|---|---|---|---|---|---|---|---|---|---|---|
| $F_1$            | 1 | 0 | 0 | 1 | 1 | 0 | 1 | 0 | 1 | 1 | 0 | 0 | 0 | 0 | 0 | 0 | 0 | 0 | 0 | 0 | 1 | 7 |
| $F_2$            | 0 | 1 | 0 | 1 | 1 | 1 | 0 | 0 | 0 | 0 | 0 | 0 | 0 | 0 | 0 | 0 | 0 | 0 | 0 | 0 | 1 | 5 |
| $F_3$            | 1 | 1 | 1 | 0 | 0 | 0 | 0 | 0 | 0 | 0 | 0 | 0 | 0 | 0 | 0 | 0 | 0 | 0 | 0 | 0 | 0 | 3 |
| $F_4$            | 0 | 0 | 0 | 1 | 0 | 0 | 0 | 0 | 0 | 0 | 0 | 0 | 0 | 0 | 0 | 0 | 0 | 0 | 0 | 0 | 0 | 1 |
| $F_5$            | 0 | 0 | 0 | 0 | 1 | 0 | 0 | 0 | 0 | 0 | 0 | 0 | 0 | 0 | 0 | 0 | 0 | 0 | 0 | 0 | 0 | 1 |
| $F_6$            | 0 | 0 | 0 | 0 | 0 | 1 | 0 | 0 | 0 | 0 | 0 | 1 | 0 | 1 | 1 | 0 | 0 | 0 | 0 | 0 | 0 | 4 |
| $F_7$            | 0 | 0 | 0 | 0 | 0 | 0 | 1 | 0 | 0 | 0 | 0 | 0 | 0 | 0 | 0 | 0 | 0 | 0 | 0 | 0 | 0 | 1 |
| $F_8$            | 0 | 0 | 0 | 0 | 0 | 0 | 0 | 1 | 0 | 0 | 0 | 1 | 1 | 1 | 0 | 0 | 0 | 0 | 0 | 0 | 0 | 4 |
| $F_9$            | 0 | 0 | 0 | 0 | 0 | 0 | 0 | 0 | 1 | 0 | 0 | 1 | 1 | 1 | 0 | 0 | 0 | 0 | 0 | 0 | 0 | 4 |
| $F_{10}$         | 0 | 0 | 0 | 0 | 0 | 0 | 0 | 0 | 0 | 1 | 0 | 0 | 0 | 0 | 0 | 0 | 0 | 0 | 0 | 0 | 0 | 1 |
| $F_{11}$         | 0 | 0 | 0 | 0 | 0 | 0 | 0 | 0 | 0 | 1 | 1 | 1 | 1 | 1 | 1 | 0 | 0 | 0 | 0 | 0 | 0 | 6 |
| $F_{12}$         | 0 | 0 | 0 | 0 | 0 | 0 | 0 | 0 | 0 | 0 | 0 | 1 | 0 | 0 | 0 | 0 | 0 | 0 | 0 | 0 | 0 | 1 |
| $F_{13}$         | 0 | 0 | 0 | 0 | 0 | 0 | 0 | 0 | 0 | 0 | 0 | 0 | 1 | 0 | 0 | 0 | 0 | 0 | 0 | 0 | 0 | 1 |
| $F_{14}$         | 0 | 0 | 0 | 0 | 0 | 0 | 0 | 0 | 0 | 0 | 0 | 0 | 0 | 1 | 0 | 0 | 0 | 0 | 0 | 0 | 0 | 1 |
| $F_{15}$         | 0 | 0 | 0 | 0 | 0 | 0 | 0 | 0 | 0 | 0 | 0 | 0 | 0 | 0 | 1 | 0 | 0 | 0 | 0 | 0 | 0 | 1 |
| $F_{16}$         | 0 | 1 | 0 | 1 | 1 | 1 | 0 | 0 | 0 | 0 | 0 | 0 | 0 | 0 | 0 | 1 | 0 | 1 | 0 | 1 | 0 | 7 |
| $F_{17}$         | 1 | 1 | 0 | 1 | 1 | 0 | 0 | 0 | 0 | 0 | 0 | 0 | 0 | 0 | 0 | 0 | 1 | 0 | 0 | 0 | 0 | 5 |
| $F_{18}$         | 0 | 0 | 0 | 1 | 1 | 0 | 1 | 1 | 0 | 0 | 0 | 0 | 0 | 0 | 0 | 0 | 0 | 1 | 0 | 1 | 1 | 7 |
| $F_{19}$         | 1 | 0 | 0 | 0 | 0 | 0 | 0 | 1 | 1 | 0 | 0 | 0 | 0 | 0 | 1 | 0 | 1 | 0 | 1 | 1 | 0 | 7 |
| $F_{20}$         | 0 | 0 | 0 | 0 | 0 | 1 | 1 | 1 | 1 | 1 | 0 | 0 | 0 | 0 | 0 | 0 | 0 | 0 | 0 | 1 | 0 | 6 |
| $F_{21}$         | 0 | 0 | 0 | 0 | 0 | 0 | 0 | 0 | 0 | 0 | 0 | 1 | 1 | 1 | 0 | 0 | 0 | 0 | 0 | 0 | 1 | 4 |
| Dependence Power | 4 | 4 | 1 | 6 | 6 | 4 | 4 | 4 | 4 | 4 | 1 | 6 | 5 | 6 | 4 | 1 | 2 | 2 | 1 | 4 | 4 |   |

**Table S6.** The results of the level partitions of the reachability matrix Iteration I to Iteration IV.

| Representative risk factors | Reachability set                          | Antecedent set                          | Intersection set | Level |
|-----------------------------|-------------------------------------------|-----------------------------------------|------------------|-------|
| $F_1$                       | $F_1, F_4, F_5, F_7, F_9, F_{10}, F_{21}$ | $F_1, F_3, F_{17}, F_{19}$              | $F_1$            | III   |
| $F_2$                       | $F_2, F_4, F_5, F_6, F_{21}$              | $F_2, F_3, F_{16}, F_{17}$              | $F_2$            | III   |
| $F_3$                       | $F_1, F_2, F_3$                           | $F_3,$                                  | $F_3$            | IV    |
| $F_4$                       | $F_4$                                     | $F_1, F_2, F_4, F_{16}, F_{17}, F_{18}$ | $F_4$            | I     |

|          |                                                  |                                         |          |     |
|----------|--------------------------------------------------|-----------------------------------------|----------|-----|
| $F_5$    | $F_5$                                            | $F_1, F_2, F_5, F_{16}, F_{17}, F_{18}$ | $F_5$    | I   |
| $F_6$    | $F_6, F_{12}, F_{14}, F_{15}$                    | $F_2, F_6, F_{16}, F_{20}$              | $F_6$    | II  |
| $F_7$    | $F_7$                                            | $F_1, F_7, F_{18}, F_{20}$              | $F_7$    | I   |
| $F_8$    | $F_8, F_{12}, F_{13}, F_{14}$                    | $F_8, F_{18}, F_{19}, F_{20}$           | $F_8$    | II  |
| $F_9$    | $F_9, F_{12}, F_{13}, F_{14}$                    | $F_1, F_9, F_{19}, F_{20}$              | $F_9$    | II  |
| $F_{10}$ | $F_{10}$                                         | $F_1, F_{10}, F_{11}, F_{20}$           | $F_{10}$ | I   |
| $F_{11}$ | $F_{10}, F_{11}, F_{12}, F_{13}, F_{14}, F_{15}$ | $F_{11}$                                | $F_{11}$ | II  |
| $F_{12}$ | $F_{12}$                                         | $F_6, F_8, F_9, F_{11}, F_{12}, F_{21}$ | $F_{12}$ | I   |
| $F_{13}$ | $F_{13}$                                         | $F_8, F_9, F_{11}, F_{13}, F_{21}$      | $F_{13}$ | I   |
| $F_{14}$ | $F_{14}$                                         | $F_6, F_8, F_9, F_{11}, F_{14}, F_{21}$ | $F_{14}$ | I   |
| $F_{15}$ | $F_{15}$                                         | $F_6, F_{11}, F_{15}, F_{19}$           | $F_{15}$ | I   |
| $F_{16}$ | $F_2, F_4, F_5, F_6, F_{16}, F_{18}, F_{20}$     | $F_{16},$                               | $F_{16}$ | V   |
| $F_{17}$ | $F_1, F_2, F_4, F_5, F_{17}$                     | $F_{17}, F_{19}$                        | $F_{17}$ | IV  |
| $F_{18}$ | $F_4, F_5, F_7, F_8, F_{18}, F_{20}, F_{21}$     | $F_{16}, F_{18}$                        | $F_{18}$ | IV  |
| $F_{19}$ | $F_1, F_8, F_9, F_{15}, F_{17}, F_{19}, F_{20}$  | $F_{19}$                                | $F_{19}$ | V   |
| $F_{20}$ | $F_6, F_7, F_8, F_9, F_{10}, F_{20}$             | $F_{16}, F_{18}, F_{19}, F_{20}$        | $F_{20}$ | III |
| $F_{21}$ | $F_{12}, F_{13}, F_{14}, F_{21}$                 | $F_1, F_2, F_{18}, F_{21}$              | $F_{21}$ | II  |
